# Supplementary material for: Cultural Characterization and Antagonistic Activity of Cladobotryum virescens against Some Phytopathogenic Fungi and Oomycetes
Source: MDPI journal article supplement (doi:10.3390/agronomy13020389), 2023-01-28
Supplement: s1 [file s1]

Supplementary information

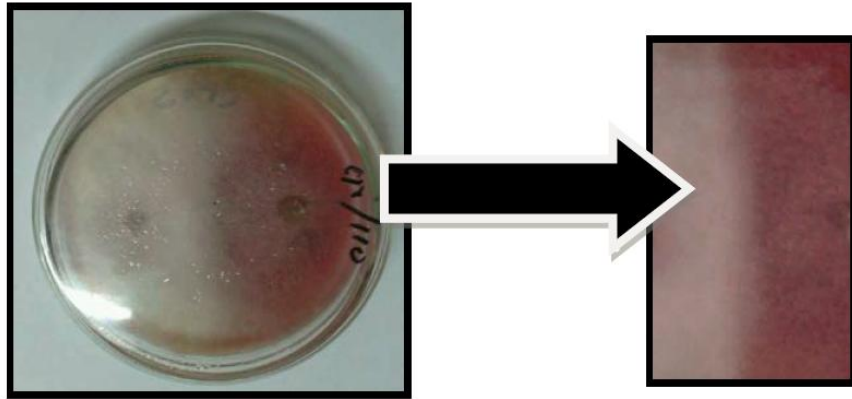

**Figure S1.** Confrontation of the colonies of *Cladobotryum virescens* and *Fusarium chlamydosporum*.

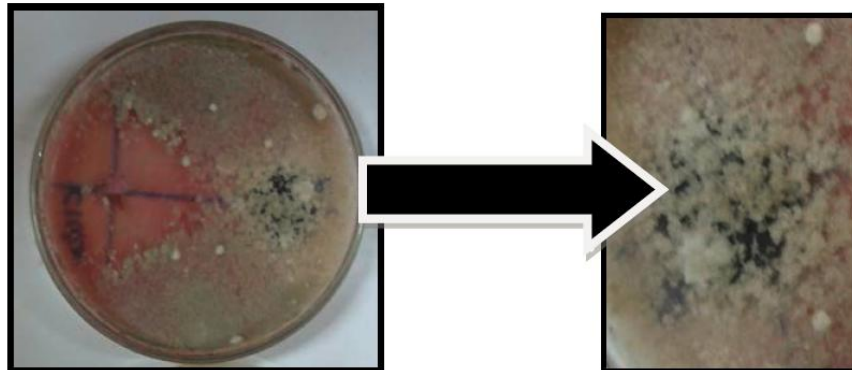

**Figure S2.** Confrontation of the colonies of *Cladobotryum virescens* and *Alternaria brassicicola*.
